# Supplementary material for: Mouse Model for ROS1-Rearranged Lung Cancer
Source: PLOS journal article supplement (doi:10.1371/journal.pone.0056010), 2013-02-13
Supplement: S1 (10.1371/journal.pone.0056010.s001) [file journal.pone.0056010.s001]

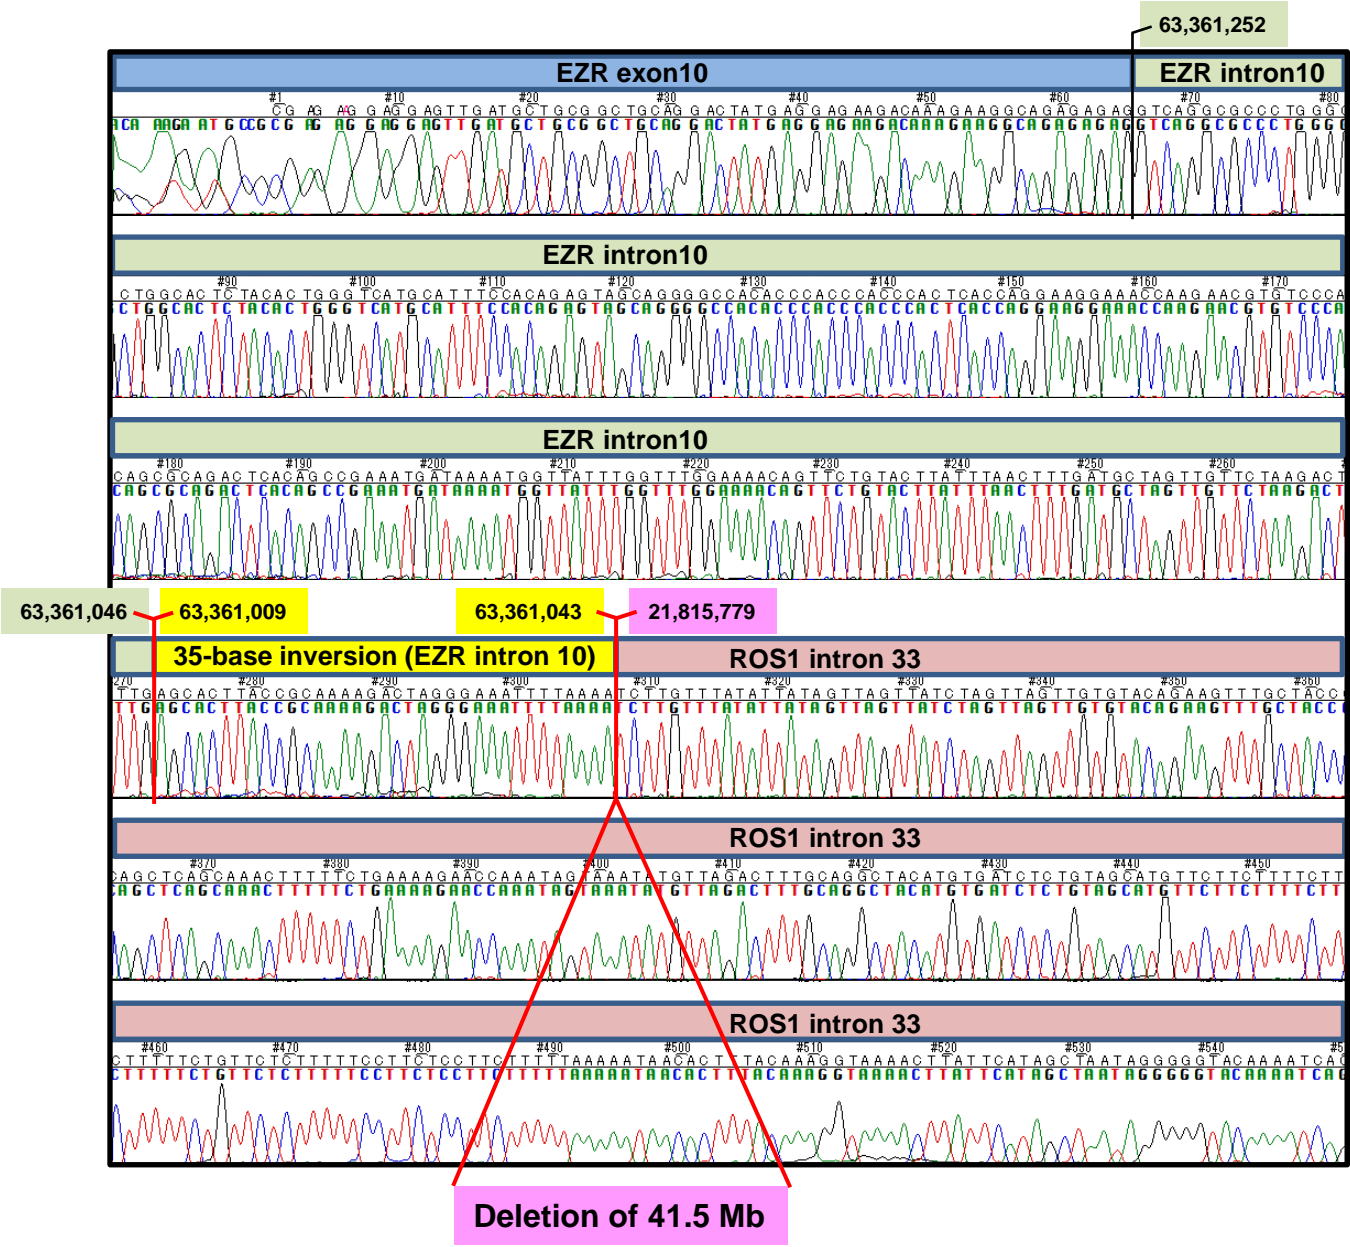

**Figure S1 Detection of EZR-ROS1 genomic breakpoint junction.**  
Electropherogram for Sanger sequencing of genomic fragments encompassing the EZR-ROS1 breakpoint junction of LCY66 tumor. Genomic PCR products amplified by the EZR-e10-CF1 and ROS1-e34-CR1 primers were directly sequenced using the EZR-e10-CF1 primer. Numbers above the electropherogram indicate genomic position in chromosome 6 (human genome build 37.3). A genomic fragment of 35 bp of EZR intron 10 was inverted within the intron before the fusion to ROS1 intron 33.

Primers:  
EZR-e10-CF1: GAAAAGGAGAGAAACCGTGGAG  
ROS1-e34-CR1: TCAGTGGGATTGTAACAACCAG
